# Supplementary material
Source: PubMed Central journal article supplement (PMC5312668)
Supplement: NIHMS848474-supplement-Figure_Legends.pdf [file NIHMS848474-supplement-Figure_Legends.pdf]

## **Figure Legends**

**Figure 1** Flow of participants through trial

**Figure 2** Change in weight at all time points in the study groups
